# Supplementary material for: Comparative Analysis of Mitochondrial Genomes in Distinct Nuclear Ploidy Loach Misgurnus anguillicaudatus and Its Implications for Polyploidy Evolution
Source: PubMed Central journal article supplement (PMC3958399; doi:10.1371/journal.pone.0092033), 2014-03-18
Supplement: pone.0092033.s001.pdf [file pone.0092033.s001.pdf]

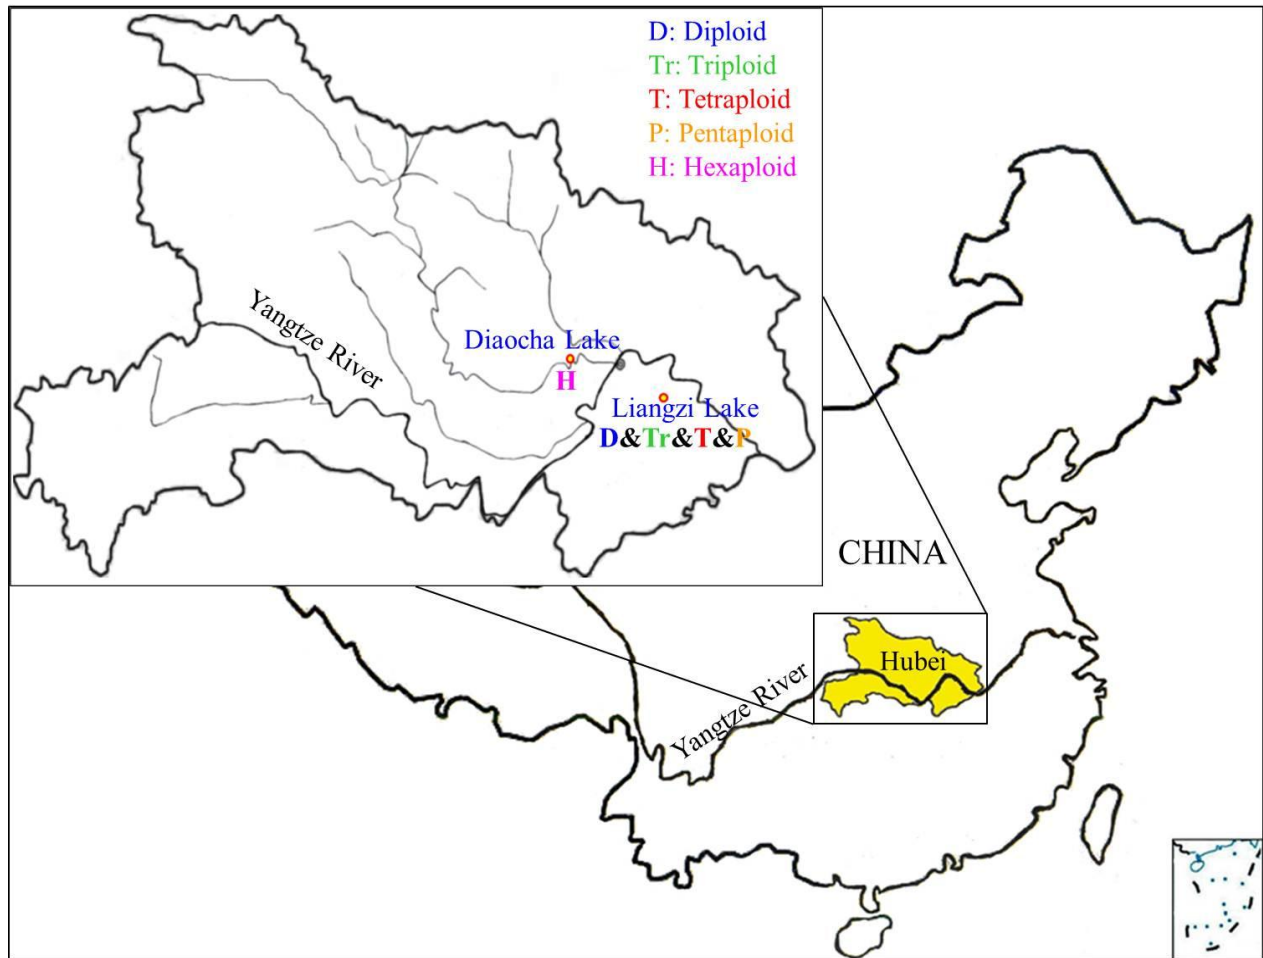

Figure S1 Map of China showing the sampling location at Liangzi Lake area (30°12'55"N 114°30'7"E) and Diaochahu area (113°43'18.5" E, 30°39'44.6" N), Hubei province, China.
