# Supplementary material for: Comparative Analysis of Mitochondrial Genomes in Distinct Nuclear Ploidy Loach Misgurnus anguillicaudatus and Its Implications for Polyploidy Evolution
Source: PubMed Central journal article supplement (PMC3958399; doi:10.1371/journal.pone.0092033), 2014-03-18

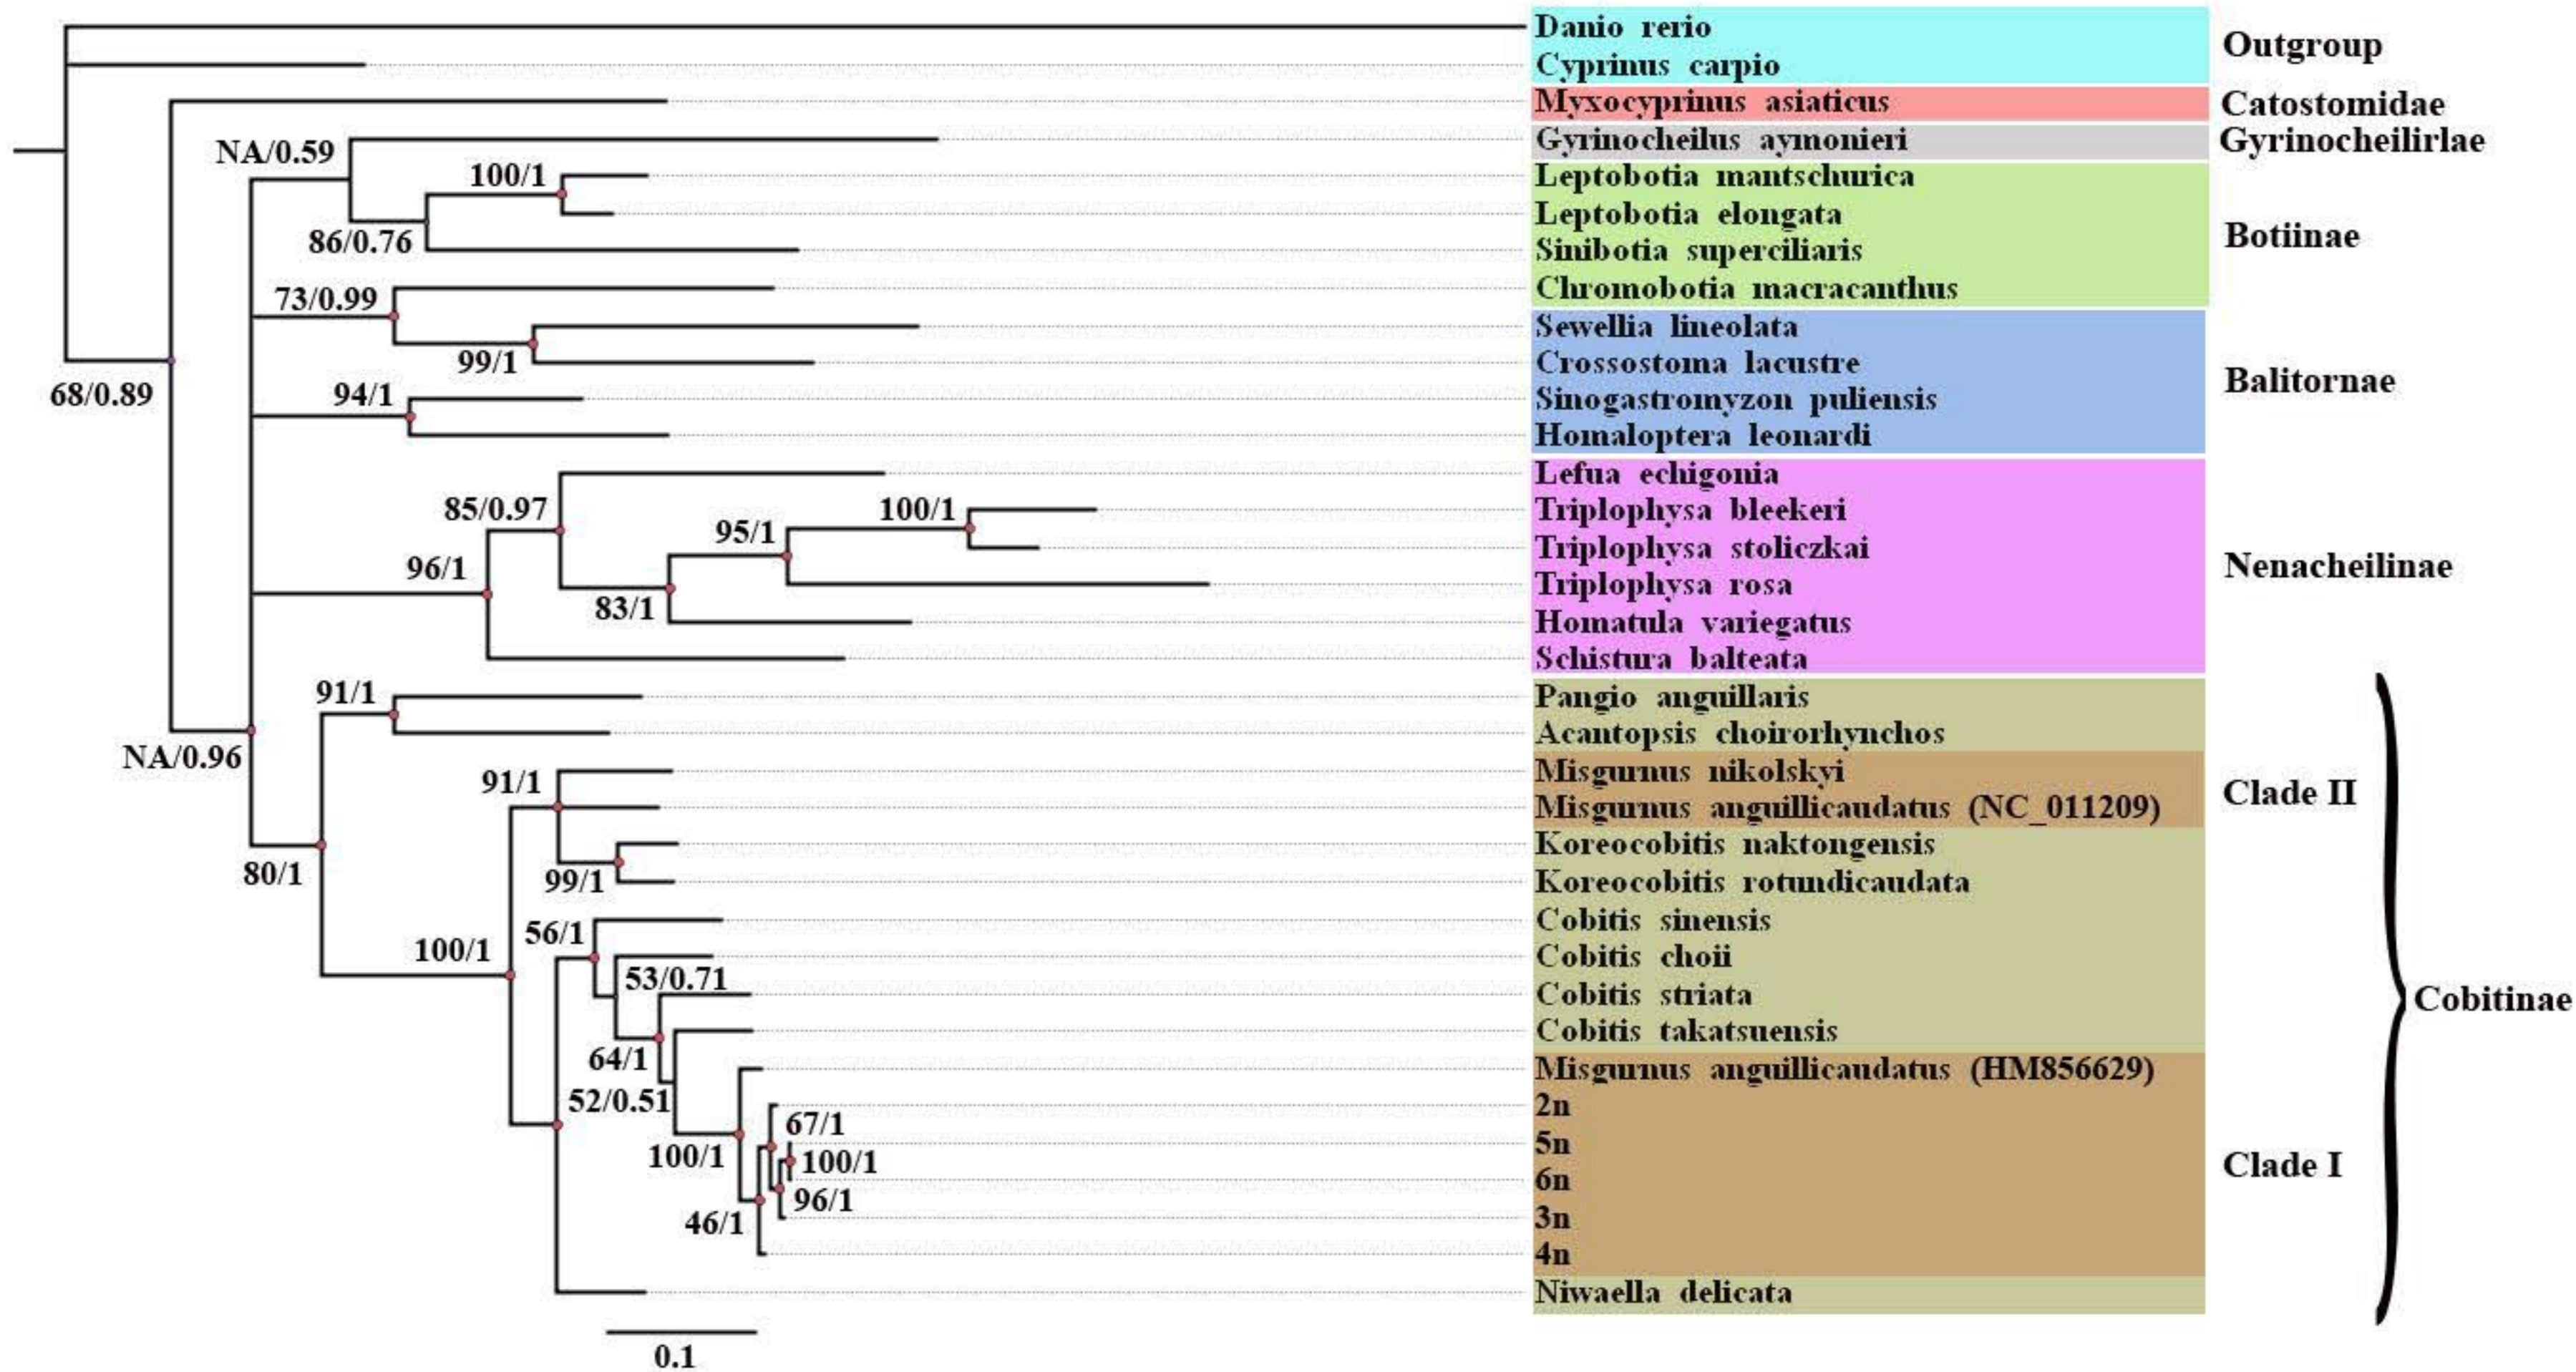

Supplement: pone.0092033.s002.pdf [file pone.0092033.s002.pdf]
