# Supplementary material for: Comparative Analysis of Mitochondrial Genomes in Distinct Nuclear Ploidy Loach Misgurnus anguillicaudatus and Its Implications for Polyploidy Evolution
Source: PubMed Central journal article supplement (PMC3958399; doi:10.1371/journal.pone.0092033), 2014-03-18
Supplement: pone.0092033.s003.pdf [file pone.0092033.s003.pdf]

Table S1 Primers designed for amplifying mitochondrial genome of *Misgurnus anguillicaudatus*

| Forward          | Sequence (5'-3')                   | Reverse    | Sequence (5'-3')                   |
|------------------|------------------------------------|------------|------------------------------------|
| Long PCR primers |                                    |            |                                    |
| S-LA-16S-H       | TGCACCATTRGGATGTCCTGATC<br>CAACATC | L12321-Leu | GGTCTTAGGAACCAAAAACTCTT<br>GGTGCAA |
| S-LA-16S-L       | CGATTAAAGTCCTACGTGATCTG<br>AGTTCAG | H15149-CYB | GGTGGCKCCTCAGAAGGACATTT<br>GKCCTCA |
| Internal primers |                                    |            |                                    |
| NQ1F             | CACTGAAGATGCTAAGATGG               | NQ1R       | TCTCTGCCTGTTGTATGC                 |
| NQ2F             | TTACACCGAGAAGACATCC                | NQ2R       | AGTTCCATTATCCGCTAAGT               |
| NQ3F             | CAGTGACCACAAGTTCAAC                | NQ3R       | GCATATTCAGCCAGGAAGA                |
| NQ4F             | TCTCTAGCCTTGCCGTATA                | NQ4R       | GTTGATAGGATTAGACCTGTTG             |
| NQ5F             | ATAGCACAGCAGCATCAC                 | NQ5R       | GCAGTTCCAACCATTCCA                 |
| NQ6F             | AACTTAGACCAAGAGCCTTC               | NQ6R       | CACGAGTATCAACATCTATTCC             |
| NQ7F             | ACTGCCGTTCTTCTTCTAC                | NQ7R       | AGCCTAAGTCCTCATAGTCA               |
| NQ8F             | ATAACCACTCTGCCACTTC                | NQ8R       | CGATTGATTAGTCAGCCTTG               |
| NQ9F             | CGTTCCACTTGAGCACTT                 | NQ9R       | ATGGTCAGAAGAAGCAGAAT               |
| NQ10F            | GTCTATTCATTCGTCCATTAGC             | NQ10R      | GCATTGTAGGAGATTGAGGTT              |
| NQ11F            | AAGACCGTGGTTCAACTC                 | NQ11R      | TGTGTTGCTCGTAAGTG                  |
| NQ12F            | TGTTACCTCTGACTACCTA                | NQ12R      | CATCTGCTCGTCCGTATC                 |
| NQ13F            | CAACAACCTCTAATCCTCTCCT             | NQ13R      | CCAGCAATAATACTTCCTCAG              |
| NQ14F            | CTGGCATTCCCTTCACATCT               | NQ14R      | TTCTTCAAGTCACTGGTCTC               |
| NQ15F            | CTGCCACCACTAATCCTAA                | NQ15R      | GCTCACTCTAATGCCTTGT                |
| NQ16F            | GCCACTATTCTACATCTACTCT             | NQ16R      | GCATAAGTCAACACCTACTG               |
| NQ17F            | AACAAGGCATTAGAGTGAG                | NQ17R      | GTATGACAGCCAAGAGGT                 |
| NQ18F            | GATACCAGTAGAACATCCAT               | NQ18R      | GCCCTCTTATCCCTAACTA                |
