# Supplementary material for: Comparative Analysis of Mitochondrial Genomes in Distinct Nuclear Ploidy Loach Misgurnus anguillicaudatus and Its Implications for Polyploidy Evolution
Source: PubMed Central journal article supplement (PMC3958399; doi:10.1371/journal.pone.0092033), 2014-03-18
Supplement: pone.0092033.s004.pdf [file pone.0092033.s004.pdf]

Table S2 List of species used in the phylogenetic analyses and their references.

| Species                            | Accession No. | References            |
|------------------------------------|---------------|-----------------------|
| <i>Danio rerio</i>                 | NC_002333     | Broughton et al. 2001 |
| <i>Cyprinus carpio</i>             | NC_001606     | Chang et al. 1994     |
| <i>Myxocyprinus asiaticus</i>      | AY986503      | Peng et al.2006       |
| <i>Gyrinocheilus aymonieri</i>     | DQ026432      | He et al.2008         |
| <i>Lefua echigonia</i>             | AB054126      | Saitoh et al.2003     |
| <i>Homaloptera leonardi</i>        | AB242165      | Saitoh et al.2006     |
| <i>Misgurnus nikolskyi</i>         | AB242171      | Saitoh et al.2006     |
| <i>Pangio anguillaris</i>          | AB242168      | Saitoh et al.2006     |
| <i>Schistura balteata</i>          | AB242172      | Saitoh et al.2006     |
| <i>Leptobotia mantschurica</i>     | AB242170      | Saitoh et al.2006     |
| <i>Chromobotia macracanthus</i>    | AB242163      | Saitoh et al.2006     |
| <i>Acantopsis choirorhynchos</i>   | AB242161      | Saitoh et al.2006     |
| <i>Cobitis striata</i>             | AP010782      | Saitoh et al.2010     |
| <i>Cobitis takatsuensis</i>        | AP009306      | Saitoh et al.2010     |
| <i>Niwaella delicata</i>           | AP009308      | Saitoh et al.2010     |
| <i>Crossostoma lacustre</i>        | AP010774      | Saitoh et al.2011     |
| <i>Homatula variegatus</i>         | JX144893      |                       |
| <i>Cobitis choui</i>               | EU656112      | Kim et al.2008        |
| <i>Koreocobitis naktongensis</i>   | JN607252      | Kim & Bang 2012       |
| <i>Koreocobitis rotundicaudata</i> | JN607253      | Kim & Bang 2012       |
| <i>Leptobotia elongata</i>         | JQ230103      | Li et al.2012         |
| <i>Cobitis sinensis</i>            | AY526868      | Wang et al. 2011      |
| <i>Sinibotia superciliaris</i>     | JX155735      | Ye et al.2013         |
| <i>Sinogastromyzon puliensis</i>   | FJ605359      |                       |
| <i>Sewellia lineolata</i>          | AP011292      | Tang et al.2010       |

|                                                |           |                 |
|------------------------------------------------|-----------|-----------------|
| <i>Triplophysa bleekeri</i>                    | JX135578  | Tang et al.2013 |
| <i>Triplophysa rosa</i>                        | JF268621  | Wang et al.2012 |
| <i>Triplophysa stoliczkai</i>                  | JQ663847  | Li et al.2013   |
| <i>Misgurnus anguillicaudatus</i> (WH)         | NC_011209 | He et al.2008   |
| <i>Misgurnus anguillicaudatus</i> (PY)         | HM856629  | Zeng et al.2012 |
| <i>Misgurnus anguillicaudatus</i> (Diploid)    | KC884745  | This study      |
| <i>Misgurnus anguillicaudatus</i> (Triploid)   | KC823274  | This study      |
| <i>Misgurnus anguillicaudatus</i> (Tetraploid) | KC762740  | This study      |
| <i>Misgurnus anguillicaudatus</i> (Pentaploid) | KC881110  | This study      |
| <i>Misgurnus anguillicaudatus</i> (Hexaploid)  | KC734881  | This study      |

## Reference

1. Broughton RE, Milam JE, Roe BA (2001) The complete sequence of the zebrafish (*Danio rerio*) mitochondrial genome and evolutionary patterns in vertebrate mitochondrial DNA. *Genome Research* 11:1958-1967.
2. Chang Y, Huang F, Lo T (1994) The complete nucleotide sequence and gene organization of carp (*Cyprinus carpio*) mitochondrial genome. *Journal of Molecular Evolution* 38: 138-155.
3. Peng Z, Wang J, He X (2006) The complete mitochondrial genome of the helmet catfish *Cranoglanis boudierius* (Siluriformes: Cranoglanididae) and the phylogeny of otophysan fishes. *Gene* 376: 290-297.
4. He S, Gu X, Mayden RL, Chen WJ, Conway KW, et al. (2008) Phylogenetic position of the enigmatic genus *Psilorhynchus* (Ostariophysi: Cypriniformes): evidence from the mitochondrial genome. *Molecular Phylogenetics and Evolution* 47:419-425.
5. Saitoh K, Miya M, Inoue JG, Ishiguro NB, Nishida M (2003) Mitochondrial genomics of ostariophysan fishes: perspectives on phylogeny and biogeography. *Journal of Molecular Evolution* 56:464-472.
6. Saitoh K, Sado T, Mayden RL, Hanzawa N, Nakamura K, et al. (2006) Mitogenomic evolution and relationships of the Cypriniformes (Actinopterygii: Ostariophysi): the first evidence toward resolution of higher-level relationships of the world's largest freshwater fish clade based on 59 whole mitogenome sequences. *Journal of Molecular Evolution* 63:826-841.
7. Saitoh K, Chen WJ, Mayden RL (2010) Extensive hybridization and tetraploidy in spined loach fish. *Molecular Phylogenetics and Evolution* 56:1001-1010.

8. Saitoh K, Sado T, Doosey MH, Bart HL, Jr Inoue JG, et al. (2011) Evidence from mitochondrial genomics supports the lower Mesozoic of South Asia as the time and place of basal divergence of cypriniform fishes (Actinopterygii: Ostariophysi). *Zoological Journal of the Linnean Society* 161:633-662.
9. Kim KY, Lee SY, Bang IC, Nam YK (2008) Complete mitogenome sequence of an endangered freshwater fish, *Iksookimia choui* (Teleostei; Cypriniformes; Cobitidae). *Mitochondrial DNA* 19:438-445.
10. Kim KY, Bang IC (2012) Phylogeny and speciation time estimation of two *Koreocobitis* species (Teleostei; Cypriniformes; Cobitidae) endemic to Korea inferred from their complete mitogenomic sequences. *Genes Genomics* 34:35-42.
11. Li P, Yang C, Tu F, Liu G (2012) The complete mitochondrial genome of the Elongate loach *Leptobotia elongata* (Cypriniformes: Cobitidae). *Mitochondrial DNA* 23:352-354.
12. Wang JL, Shen T, Ju JF, Yang GA (2011) The complete mitochondrial genome of the Chinese longsnout catfish *Leiocassis longirostris* (Siluriformes: Bagridae) and a time-calibrated phylogeny of ostariophysan fishes. *Molecular Biology Reports* 38: 2507-2516.
13. Ye H, Huang Y, Wang J, Peng Z, Zhang Y (2013) Determination and comparison of two complete mitochondrial genomes of golden Chinese loach, *Sinibotia superciliaris* (Teleostei, Cypriniformes). *Mitochondrial DNA* 24:34-36.
14. Tang KL, Agnew MK, Hirt MV, Sado T, Schneider LM, et al. (2010) Systematics of the subfamily Danioninae (Teleostei: Cypriniformes: Cyprinidae). *Molecular Phylogenetics and Evolution* 57:189-214.
15. Tang Q, Huang Y, Wang J, Huang J, Wang Z, et al. (2013) The complete mitochondrial genome sequence of *Triplophysa bleekeri* (Teleostei, Balitoridae, Nemacheilinae). *Mitochondrial DNA* 24:25-27.
16. Wang J, Tang Q, Wang Z, Zhang Y, Wu Q, et al. (2012) The complete mitogenome sequence of a cave loach *Triplophysa rosa* (Teleostei, Balitoridae, Nemacheilinae). *Mitochondrial DNA* 23:366-368.
17. Li T, Gao C, Cui Y, Xie Q, Bu W (2013) The Complete Mitochondrial Genome of the Stalk-Eyed Bug *Chauliops fallax* Scott, and the Monophyly of Malcidae (Hemiptera: Heteroptera). *PLoS ONE* 8(2): e55381.
18. Zeng L, Wang J, Sheng J, Gu Q, Hong Y (2012) Molecular characteristics of mitochondrial DNA and phylogenetic analysis of the loach (*Misgurnus anguillicaudatus*) from the Poyang Lake. *Mitochondrial DNA* 23: 187-200.
